# Supplementary material for: Fluorine NMR study of proline-rich sequences using fluoroprolines
Source: Copernicus journal article supplement (doi:10.5194/mr-2-795-2021), 2021-11-09
Supplement: Supplementary file 2 [file mr-2-795-2021-supplement.zip]

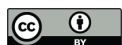

## *Supplement of*

# **Fluorine NMR study of proline-rich sequences using fluoroprolines**

**Davy Sinnaeve et al.**

*Correspondence to:* Bruno Kieffer (kieffer@igbmc.fr) and Davy Sinnaeve (davy.sinnaeve@univ-lille.fr)

- [mr-2-795-2021-supplement-title-page.pdf](#)
- [MR-2021-54\\_SuppMat](#)
  - [MR-2021-54-nb0.ipynb](#)
  - [MR-2021-54-nb1.ipynb](#)
  - [MR\\_fPRO\\_Supp\\_Mat\\_210909.pdf](#)

The copyright of individual parts of the supplement might differ from the article licence.
