# Supplementary material for: Fluorine NMR study of proline-rich sequences using fluoroprolines
Source: Magn Reson (Gott). 2021 Nov 9;2(2):795–813. doi: 10.5194/mr-2-795-2021 (PMC10539733; doi:10.5194/mr-2-795-2021)
Supplement: The supplement related to this article is available online at: https://doi.org/10.5194/mr-2-795-2021-supplement. [file mr-2-795-supplement.zip]

Archive with 5 entries (4 files):
- mr-2-795-2021-supplement-title-page.pdf
- MR-2021-54_SuppMat/
- MR-2021-54_SuppMat/MR-2021-54-nb0.ipynb
- MR-2021-54_SuppMat/MR_fPRO_Supp_Mat_210909.pdf
- MR-2021-54_SuppMat/MR-2021-54-nb1.ipynb
