# Supplementary material for: Fluorine NMR study of proline-rich sequences using fluoroprolines
Source: Magn Reson (Gott). 2021 Nov 9;2(2):795–813. doi: 10.5194/mr-2-795-2021 (PMC10539733; doi:10.5194/mr-2-795-2021)
Supplement: The supplement related to this article is available online at: https://doi.org/10.5194/mr-2-795-2021-supplement. [file mr-2-795-supplement.zip › MR-2021-54_SuppMat/MR-2021-54-nb0.ipynb]

# %% [markdown]
# I. Modeling Titration of Vinexin b SH3.3 by MpSR

## Supplementary material for the manuscript MR-2021-54

### 1. Experimental Design

    - The peptide and protein solution are dialyzed using the same batch of buffer (Phosphate pH 7.0 40mM 100mM NaCl) to ensure buffer consistency between the solutions and prevent any sovent effect.

    - The titration is made sequentially using 80 uL capillaries in 3 mm tubes. The 3 mm tube contains D2O for the lock to avoid dilution of peptide and protein solutions. 
    
    - Volumes are manipulated using teflon tubing plugged on a Hamilton seringe.
    
    - Optimal sampling of the titration curve is obtained using two stock solutions of the peptide (with concentrations of L0 and L0/2: L0 typically between 4 and 6mM).
    
The following script computes the expected bound fractions of ligand (peptide) and protein (SH3) assuming a single binding site on the peptide and activities equal to unity.

# %% [markdown]
### 2. Modelling titration curves

# %% [code]
# Run this cell to define the necessary functions and definitions
import numpy as np
import matplotlib.pyplot as plt
%matplotlib notebook

def boundf(l0,e0,kd) :
    """ Calculate the bound fraction of SH3 
        - l0 : total concentration of peptide
        - e0 : total concentration of SH3
        - kd : dissociation constant """
    
    y = l0/e0
    b = 1+y+(kd/e0)
    z = np.sqrt(b**2 - 4*y)
    x = (b - z)/2
    return x

# %% [code]
stock_cc

# %% [code]
# This script vizualizes both ligand and protein bound fractions for different Kd

# Experimental parameters :
E0    = 314.E-6    # Concentration of protein (SH3) (in M.)
L0_S0 = 6.E-3      # Peptide Stock Solution 1  (in M.)
L0_S1 = L0_S0/2    # Peptide Stock Solution 2 (diluted) (in M.)

V0  = 50.E-6        # Initial volume of protein (SH3) in L
E0m = E0*V0         # Initial amount of protein
L0m = 0.            # Initial amount of Peptide in the tube

# Volumes of the aliquots in L.
added_vol = np.array([1, 2., 2., 3, 3., 5., 10., 20.])*1E-6
         ##stock_cc is inversed: we start by adding aliquots of the diluted stock
#stock_type = np.array([0, 0, 0, 0, 1, 1, 1, 1])      # 1: L0_S1 (diluted solution), 0: L0_S0 (concentrated solution)
stock_type = np.array([1, 1, 1, 1, 0, 0, 0, 0]) 
stock_cc = stock_type*L0_S1+(1. - stock_type)*L0_S0  # Array of used stock solutions

# List of Kd to be represented with corresponding color code
Kd_list = np.array([50.,100.,200.,400.])*1E-6  #Dissociation constant (in M.)
Kd_color =['blue','violet','orange','red']

for c,Kd in enumerate(Kd_list):   # Loop on Kd values

    XP  = []  # This list will contain the bound fraction of SH3 at each titration point
    YP  = []  # This list will contain the bound fraction of peptide at each titration point
    L0P = []  # This list will contain the concentration of peptide at each titration point
    Vi = V0   # reset sample volume
    Lim = L0m # reset initial amount of peptide
    lbl=u"{:3.0f} µM".format(Kd*1.E6) #

    for i,aliquot in enumerate(added_vol):      # Loop through each titration points
        
        Vi = Vi + aliquot                           # Current sample volume 
        Ei = E0m/Vi                                 # Current concentration of SH3
        Lim = Lim + stock_cc[i]*aliquot             # Cumulated amount of Peptide
        Li = Lim/Vi                                 # Cumulated concentration of Peptide
        x = boundf(Li,Ei,Kd)                        # Computes bound fraction of SH3
        y = x*Ei/Li                                 # Computes the bound fraction of peptide
        XP.append(x)
        YP.append(y)
        L0P.append(Li)
        
    # Plot the titration curves
    L0P = np.array(L0P)*1e6                          # Peptide concentration in uM. 
    plt.plot(np.append([0.],L0P),np.append([0.],XP),color=Kd_color[c],marker='o', linestyle='solid',label=lbl)
    plt.plot(L0P,YP,color=Kd_color[c],marker='o', linestyle='dashed',label='')
    
plt.legend(bbox_to_anchor=(1., 0.6))
plt.xlabel(u'Peptide concentrations [µM]')
plt.ylabel(u'Bound fractions [%] Peptide (...)/SH3 (-)')
plt.text(250.,0.1,'Peptide bound fraction', bbox={'facecolor':'red', 'alpha':0.5, 'pad':10})
plt.text(1500,0.85,u'SH3 complex', bbox={'facecolor':'red', 'alpha':0.5, 'pad':10})

# %% [code]
