# Supplementary material for: Fluorine NMR study of proline-rich sequences using fluoroprolines
Source: Magn Reson (Gott). 2021 Nov 9;2(2):795–813. doi: 10.5194/mr-2-795-2021 (PMC10539733; doi:10.5194/mr-2-795-2021)
Supplement: The supplement related to this article is available online at: https://doi.org/10.5194/mr-2-795-2021-supplement. [file mr-2-795-supplement.zip › MR-2021-54_SuppMat/MR-2021-54-nb1.ipynb]

# %% [markdown]
# II. Estimating the uncertainty on fitted NMR parameters

## Supplementary material for the manuscript MR-2021-54

### 1. Notes to run the following script

This script show how uncertainties on peak frequencies and width were estimated from 1D Fluorine spectra. The spectra were processed using Spike software that is freely available from:

https://github.com/spike-project/spike


# %% [code]
import numpy as np
import matplotlib.pylab as plt
from scipy.optimize import least_squares
%matplotlib notebook

import spike  # Import NMR processing software
from spike.File.BrukerNMR import Import_1D


# Define some utility functions
def get_SNR(r, noise = (0., 0.)):
    """ Evaluate the Signal/Noise ratio
        r is a spike 1D object
        noise is a 2-tuple containing the bondaries of the region (in ppm) used to evaluate the noise"""

    sig = r.get_buffer().max() # Take maximal height on the whole spectrum
    noise = r.get_buffer()[int(r.axis1.ptoi(noise[0])):int(r.axis1.ptoi(noise[1]))].std()
    print("SNR = ", sig/noise)
    return sig/noise

def create_mask(d,bonds = [()]):
    """ Create_mask :  creates a numpy array containing 1. within area defined by the bonds of the 
                        peaks to be fitted, and 0. outside 
        d : a Spike object to define the size and units used to define the mask
        bonds : a list of bondaries (two elements tuples) of the peaks in d
                the unit of the tuple is defined by the Spike object d
                    """
    axis = d.axis1.unit_axis() # a numpy array with axis units
    mask = np.array([False]*len(axis))
    for bd in bonds:
        b1 = axis < bd[0]
        b2 = axis > bd[1]
        mask = mask + b1 * b2
    return mask

def gen_fid2(pars, exp, noise = 0.):
    """ Generates an fid according to the parameters taken from a Spike object
        Inputs :
            -  pars is a numpy array containing the peak parameters (3 parameters/component):
                [amplitude_1, frequency_1, R2_1, amplitude_2, frequency_2, R2_2, ...]
                frequency and R2 are in Hz (center in the midle of the spectrum)
            - exp is a Spike object containing the experimental spectrum parameters
            - noise : level of normally distributed random noise 
    """
        # Get spectral parameters from spectrum
    npt = exp.size1                  #get the size of the experimental spectrum
    swh = exp.axis1.specwidth       #get the spectral width of the experimental spectrum
    dt = 1./(swh)                  # Compute dwell time
    offset = exp.axis1.offset
    sfo = exp.axis1.frequency
    nres = int(len(pars)/3)            # Number of signals to model
    
    fid = np.zeros(npt)+1j*np.zeros(npt) # Create an empty array with size equal to exp
    time = dt*np.arange(npt)             # Create a vector of sampled times
    
    for i in range(nres):
        (amp, freq, R2) = pars[i*3:(i+1)*3]   # identify single signal components
        angles = 2*np.pi*freq*time            # Computes the phase
        fid = fid + amp*(np.cos(angles)+ 1j*np.sin(angles))*np.exp(-R2*time)

    fid = fid + noise*(np.random.rand(npt) - 0.5*np.ones(npt))
    return fid

def residual2(pars,exp,mask):
    """ Define the function to be minimized by Leastsqr
        Inputs :
            -  pars is a numpy array with the peak parameters (3 parameters/component):
                [amplitude_1, frequency_1, R2_1, amplitude_2, frequency_2, R2_2, ...]
            - exp is a Spike object containing the experimental spectrum parameters
            - mask is an array of boolean values with the same size than exp
    """
    # Perform the processing
    fid = gen_fid2(pars,exp)
    mod = exp.copy()          # Dupplicate the experimental spectrum
    mod.set_buffer(fid)
    mod=mod.ft_sim().real()  # The processing should be provided as a parameter
    mod.set_unit('ppm')  # Should take the same unit as exp object

    diff = (mod - exp)
    mdiff = diff.get_buffer()[mask]
    
    return mdiff    
    
def ptoh(ppm,exp):
    """ Conversion from ppm to absolute frequency according the parameters defined by the spectrum in exp 
        Inputs :
            -  ppm is a frequency expressed in ppm
            -  exp : a Spike object containing an NMR spectrum
        Return :
            A frequency with 0 Hz in the center of the spectrum
    """
    swh = exp.axis1.specwidth
    offset = exp.axis1.offset
    sfo = exp.axis1.frequency
    f1 = (ppm*sfo-offset)-swh/2
    return f1

def htop(fq,exp):
    """ Conversion from an absolute frequency to ppm according the parameters defined by the spectrum in exp 
        Inputs :
            -  fq is a frequency expressed in Hz (0. Hz in the center of the spectrum)
            -  exp : a Spike object containing an NMR spectrum
        Return :
            A frequency expressed in ppm
    """
    swh = exp.axis1.specwidth
    offset = exp.axis1.offset
    sfo = exp.axis1.frequency
    ppm = (fq + swh/2 + offset)/sfo
    return ppm

def fit_peaks(peaks = [], R2 = [], amplitudes = [], exp = None, mask = [], R2_default = 50., amp_default = 1e3 ):
    """ A wrapper to the fitting function 
        Input:
            - peaks : a list of initial frequencies expressed in ppm
            - R2 : a list of initial values for transverse relaxation rates (in s-1)
            - amplitudes : a list of initial values for peak amplitudes
            - R2_default : value used as default if R2 parameter is None
            - amp_default : value used as default if amp parameter is None
            - exp is a Spike object containing the experimental spectrum parameters
            - mask is an array of boolean values with the same size than exp to define the spectral region to fit
    """

    # Build the array of initial parameters
    parini = []
    outstr = " Peak {:d} : f = {:8.3f} ppm : R2 = {:8.3f} s-1 : amplitude =  {:10.1f} "
        
    if len(mask) == 0:
        mask = [True]*exp.size1 # in case the mask is not provided, we create it with a the same size as the experimental spectrum
        
    for i,p in enumerate(peaks) :
        if len(amplitudes) == 0: #in case the parameter is not provided, a default value is taken in consideration
            parini.append(amp_default)
        else:
            parini.append(amplitudes[i])
        parini.append(ptoh(p,exp))
        if len(R2) == 0:
            parini.append(R2_default)
        else:
            parini.append(R2[i])
            
    parini = np.array(parini)   # List of initial parameters : amplitude, frequency and R2 for each signal

    print ("Number of points used to fit: {:d} ".format(mask.sum()))
    r0 = residual2(parini,exp,mask)
    print ("Initial residual: {:10.1f} ".format(r0.sum()))
    res_lsq = least_squares(residual2, parini, args=(exp, mask))
    r1 = residual2(res_lsq.x,exp,mask)
    print ("Optimized residual: {:10.1f} ".format(r1.sum()))
    
    # Print out results
    print (" Optimized Peak parameters")
    for i,p in enumerate(peaks):
        print (outstr.format(i,htop(res_lsq.x[i*3+1],exp),res_lsq.x[i*3+2],res_lsq.x[i*3]))
    
    return res_lsq


# %% [code]
# Get the spectrum with lowest peptide concentration

dataset = "/Users/benbouza/Desktop/aymeric/NMRDATA/TitrSH3_181205/"
expno = "4"

fname = dataset+expno+"/fid" 
d=Import_1D(fname)
d=d.copy().apod_em(16.).zf(zf1=2).ft_sim().bruker_proc_phase().phase(ph0=-96.7,ph1=0.).real()
d.set_unit('ppm')

#baseline correction
bs_ppm = [-156, -160, -165, -180, -185, -190]
bpts = np.array([int(d.axis1.ptoi(p)) for p in bs_ppm])   
d.bcorr(xpoints = bpts, nsmooth = 800) 

d.display()

# %% [code]
# Print experimental parameters
sw = float(d.params['acqu']['$SW'])
sw_h = float(d.params['acqu']['$SW_h'])
print("Spectral width {:f} ppm {:f} Hz".format(sw,sw_h))
td = int(d.params['acqu']['$TD'])
print ("Nb. of time domain points {:d}, Resolution {:f} Hz/Pt".format(td,sw_h/td))

# Estimate of experimental S/N
snr = get_SNR(d, noise = (-160., -165.))

# %% [code]
# Fit the first titration point and display results

peak_list = [-170.643,-176.642]  # Initial positions of the peaks (ppm)
m1 = create_mask(d,bonds = [(-170.573, -170.696),(-176.571,-176.705)]) # regions to consider for the khi2 calculation
ini_amps = [3.6e6, 3.6e6] # Initial peak amplitudes

d.set_unit('ppm')
fitted = fit_peaks(peaks = peak_list, exp = d, mask = m1, amplitudes=ini_amps)

fid = gen_fid2(fitted.x,d)
mod = d.copy()
mod.set_buffer(fid)
mod.ft_sim()
mod.set_unit('Hz')
d.set_unit('Hz')
mod.display()
d.display(new_fig = False)

# %% [code]
##### Estimating the uncertainty on the peak position for the initial titration point

snr = 72            # Noise level
ini_pos = -170.00    # Initial position of the peak (in ppm)
npoints = 100        # Number of synthetic spectra to build
delta_ppm = - 0.015  # chemical shift interval between two points
amp = 9139.7         
R2 = 40. 

noise = 2*amp*R2/snr

# List of target and fitted values for statistical analysis
true_ppm = []
fitted_ppm = []
fitted_R2 = []

for i in range(npoints):
    
    # Build a synthetic fid
    p_pos = ini_pos+i*delta_ppm        # Shift the peak position
    syn_pars = [amp, ptoh(p_pos,d),R2] # synthetic parameters
    fid = gen_fid2(syn_pars,d,noise=noise)
    sy = d.copy()
    sy.set_buffer(fid)
    
    # process the synthetic fid spectrum
    sy = sy.copy().apod_em(16).ft_sim().real()
    sy.set_unit('ppm')
    true_ppm.append(p_pos)

    # Use point with maximum intensity as starting chemical shift (ini_ppm)
    data = sy.get_buffer()
    loc = (data == data.max())*np.arange(data.size)
    pos = loc.max()
    ini_ppm = sy.axis1.itop(pos)
    
    # Prepare initial guess
    peak_list = [ini_ppm] # Initial positions of the peaks (ppm)
    m1 = create_mask(sy,bonds = [(ini_ppm+0.1, ini_ppm-0.1)]) # regions to consider for the khi2 calculation
    ini_amps = [data.max()/R2] # Initial peak amplitudes

    # Perform the fit
    fitted = fit_peaks(peaks = peak_list, exp = sy, mask = m1, amplitudes=ini_amps)
    fitted_ppm.append(htop(fitted.x[1],sy)) # Get fitted peak position
    fitted_R2.append(fitted.x[2]) # Get fitted R2
    

# %% [code]
# Statistical analysis
# Frequency
delta_ppm = np.array(true_ppm)-np.array(fitted_ppm)
print ( "Chemical shift deviation from taget values : {:f} ppm +/- {:f} ".format(delta_ppm.mean(),delta_ppm.std()))
# Transverse relaxation rate
delta_R2 = np.ones(len(fitted_R2))*R2-np.array(fitted_R2)
print ( "R2 deviation from taget values : {:f} s-1 +/- {:f} ".format(delta_R2.mean(),delta_R2.std()))


# %% [markdown]
## can we remove this part?

# Note:

The 16 s-1 devation corresponds to the line-broadening applied to the experimental data.

# %% [code]
##### Estimating the uncertainty on the peak position for the fourth titration point

snr = 50           # Noise level
ini_pos = -170.00    # Initial position of the peak (in ppm)
npoints = 100        # Number of synthetic spectra to build
delta_ppm = - 0.015  # chemical shift interval between two points
amp = 1300.        
R2 = 60.0 

noise = 2*amp*R2/snr

# List of target and fitted values for statistical analysis
true_ppm = []
fitted_ppm = []
fitted_R2 = []

for i in range(npoints):
    
    # Build a synthetic fid
    p_pos = ini_pos+i*delta_ppm        # Shift the peak position
    syn_pars = [amp, ptoh(p_pos,d),R2] # synthetic parameters
    fid = gen_fid2(syn_pars,d,noise=noise)
    sy = d.copy()
    sy.set_buffer(fid)
    
    # process the synthetic fid spectrum
    sy = sy.copy().apod_em(16).ft_sim().real()
    sy.set_unit('ppm')
    true_ppm.append(p_pos)

    # Use point with maximum intensity as starting chemical shift (ini_ppm)
    data = sy.get_buffer()
    loc = (data == data.max())*np.arange(data.size)
    pos = loc.max()
    ini_ppm = sy.axis1.itop(pos)
    
    # Prepare initial guess
    peak_list = [ini_ppm] # Initial positions of the peaks (ppm)
    m1 = create_mask(sy,bonds = [(ini_ppm+0.1, ini_ppm-0.1)]) # regions to consider for the khi2 calculation
    ini_amps = [data.max()/R2] # Initial peak amplitudes

    # Perform the fit
    fitted = fit_peaks(peaks = peak_list, exp = sy, mask = m1, amplitudes=ini_amps)
    fitted_ppm.append(htop(fitted.x[1],sy)) # Get fitted peak position
    fitted_R2.append(fitted.x[2]) # Get fitted R2

# %% [code]
# Statistical analysis
# Frequency
delta_ppm = np.array(true_ppm)-np.array(fitted_ppm)
print ( "Chemical shift deviation from taget values : {:f} ppm +/- {:f} ".format(delta_ppm.mean(),delta_ppm.std()))
# Transverse relaxation rate
delta_R2 = np.ones(len(fitted_R2))*R2-np.array(fitted_R2)
print ( "R2 deviation from taget values : {:f} s-1 +/- {:f} ".format(delta_R2.mean(),delta_R2.std()))
